# Supplementary material for: Exceptional high AOD over Svalbard in Summer 2019: A multi-instrumental approach
Source: Copernicus journal article supplement (doi:10.5194/egusphere-2025-3423), 2025-09-15
Supplement: Supplementary file 1 [file egusphere-2025-3423-supplement.pdf]

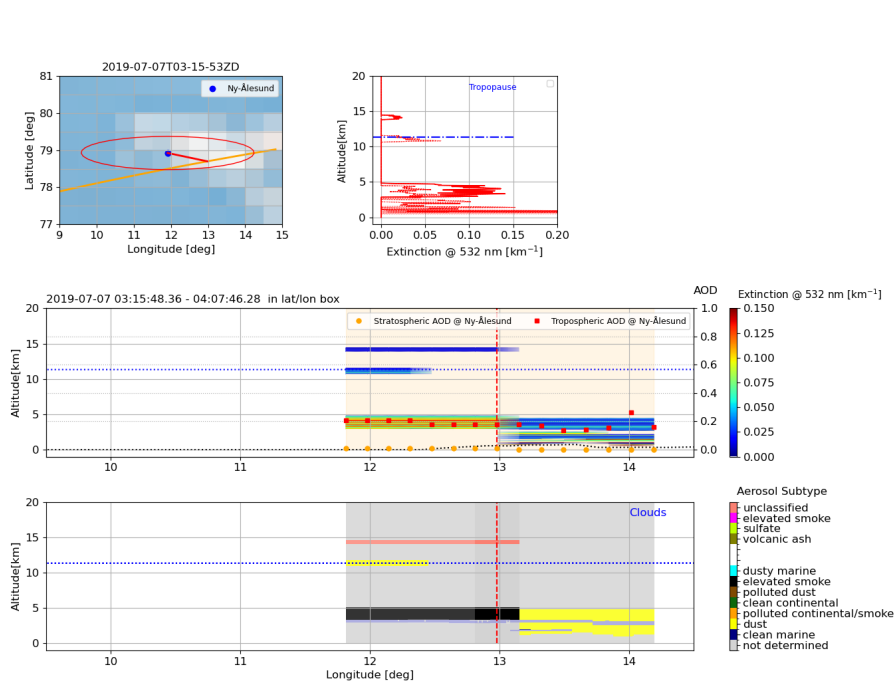

Figure S1: Example of the procedure followed to extract the CALIPSO extinction profiles from less than 50 km to Ny-Ålesund.

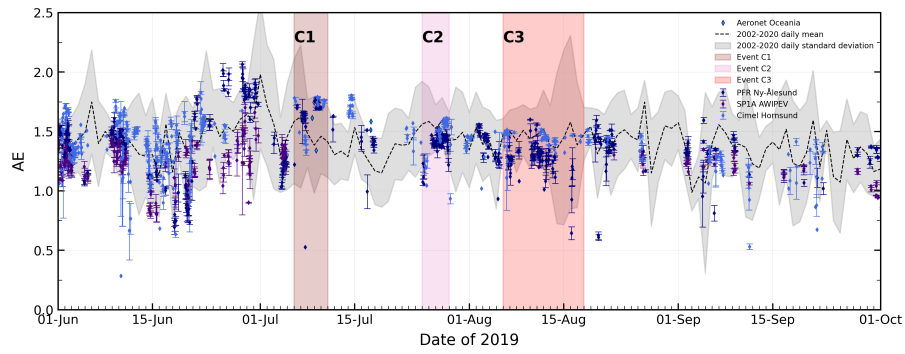

Figure S2: Ångström Exponent (AE) temporal evolution (hourly means with standard deviation) in and around Svalbard in summer 2019, with data from Ny-Ålesund, Hornsund and Oceania (in the Fram Strait). Long-term daily means and the corresponding standard deviation of all available ground-based measurements are represented by the black dashed line and grey shadow respectively.

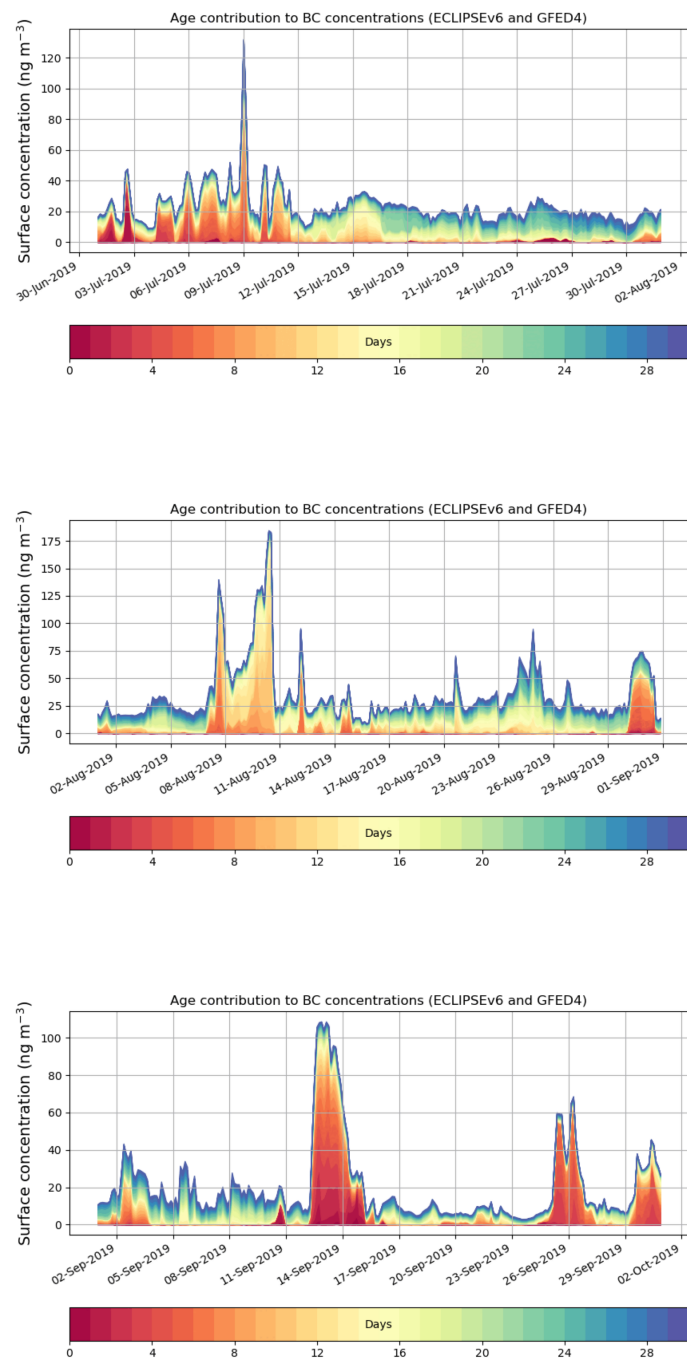

Figure S3: Age contribution to BC concentration product from FLEXPART during July, August and September.
